# Supplementary material for: Unusual cationic rhodathiaboranes: synthesis and characterization of [8,8,8-(H)(PR3)2-9-(Py)-nido-8,7-RhSB9H10]+and [1,3-μ-(H)-1,1-(PR3)2-3-(Py)-isonido-1,2-RhSB9H8]+
Source: Royal Society of Chemistry journal article supplement (doi:10.1039/c3dt52018h), 2013-09-24
Supplement: c3dt52018h.pdf [file c3dt52018h.pdf]

## Supporting Information

**Unusual Cationic Rhodathiaboranes: Synthesis and  
Characterization of [8,8,8-(H)(PR<sub>3</sub>)<sub>2</sub>-9-(Py)-*nido*-8,7-  
RhSB<sub>9</sub>H<sub>10</sub>]<sup>+</sup> and [1,3-μ-(H)-1,1-(PR<sub>3</sub>)<sub>2</sub>-3-(Py)-*isonido*-  
1,2-RhSB<sub>9</sub>H<sub>8</sub>]<sup>+</sup>**

**Beatriz Calvo, Ramón Macías, Maria Jose Artigas, Fernando J. Lahoz  
and Luis A. Oro**

<sup>†</sup>Instituto de Síntesis Química y Catálisis Homogénea (ISQCH),  
Universidad de Zaragoza-Consejo Superior de Investigaciones Científicas,  
50009-Zaragoza, Spain.

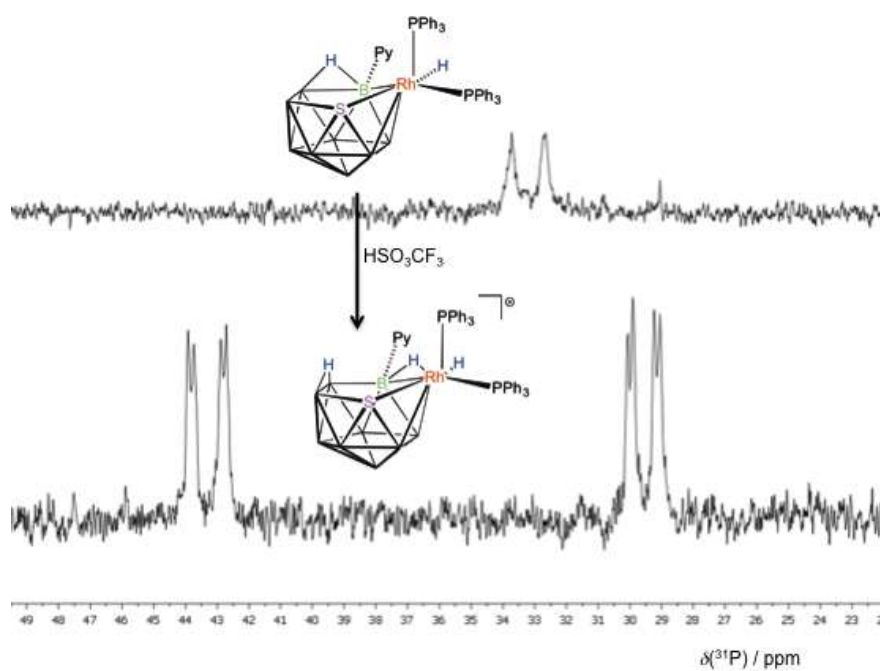

**Figure S1.**  $^{31}\text{P}\{-^1\text{H}\}$  NMR spectra of **2** and **12**.

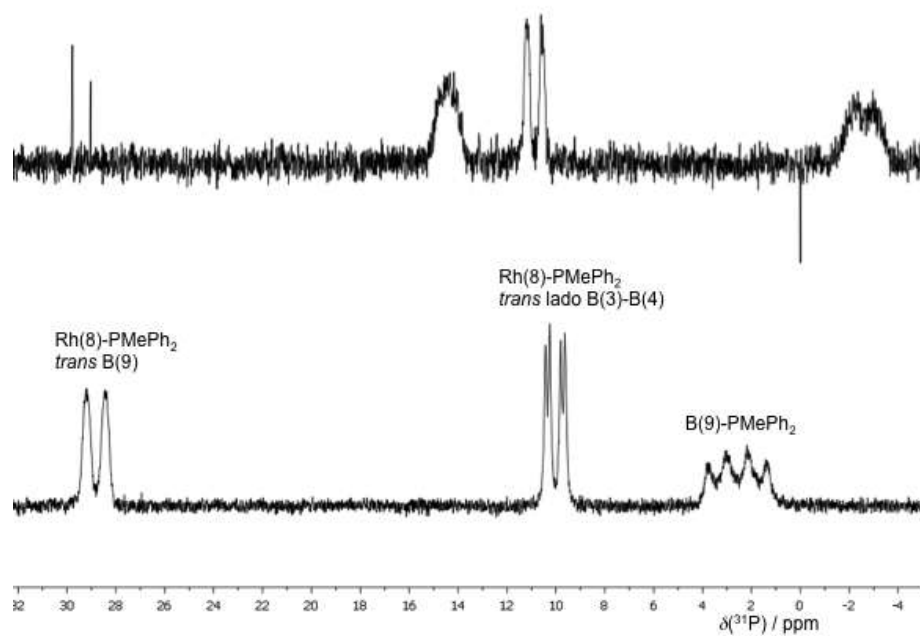

**Figure S2.**  $^{31}\text{P}\{-^1\text{H}\}$  NMR spectra of **6** (top) and **16** (bottom).

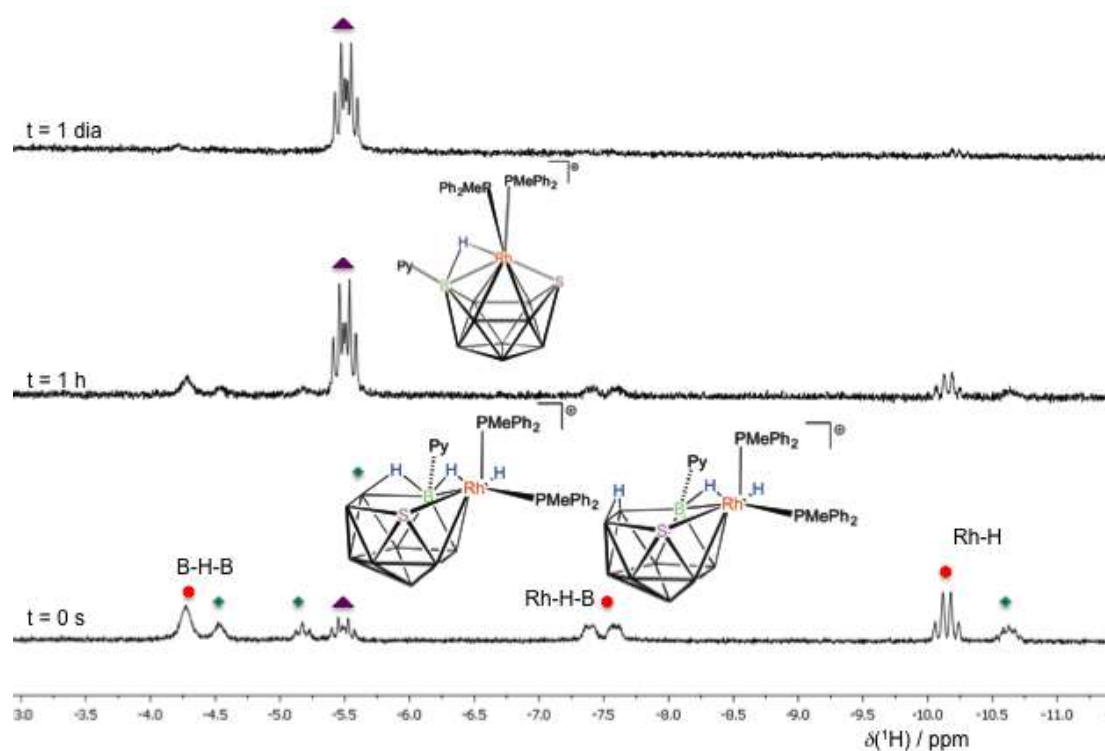

**Figure S3.**  $^1\text{H}\{-^{11}\text{B}\}$  NMR spectra of **3** after treatment with TfOH: upon addition of acid, there is formation of two cationic *nido*-isomers (red circles and green triangles), **13**, together with small amounts of the *isonido*-cation, **22**. In one day, the reaction mixture leads to the formation of **22** as a single product.

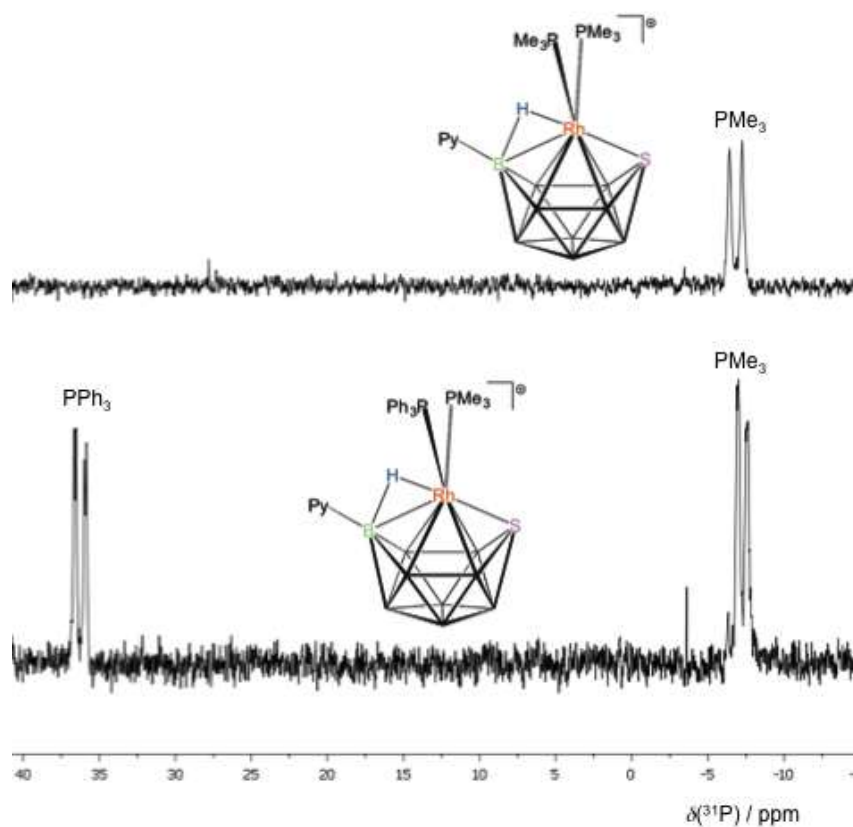

**Figure S4.**  $^{31}\text{P}\{-^1\text{H}\}$  NMR spectra of **20** (bottom) y **19** (top).

### Computational details

The geometry of all structures has been optimized with the G09 program package<sup>[1]</sup> at the DFT level using the B3LYP approximation<sup>[2]</sup> combined with the def2-SVP basis set for all atoms<sup>[3]</sup> and pseudo-potentials<sup>[4]</sup> for Rh. The nature of the stationary points has been confirmed by frequency analysis.

### References for the computational study

- [1] Gaussian 09, Revision A.1, M. J. Frisch, G. W. Trucks, H. B. Schlegel, G. E. Scuseria, M. A. Robb, J. R. Cheeseman, G. Scalmani, V. Barone, B. Mennucci, G. A.

Petersson, H. Nakatsuji, M. Caricato, X. Li, H. P. Hratchian, A. F. Izmaylov, J. Bloino, G. Zheng, J. L. Sonnenberg, M. Hada, M. Ehara, K. Toyota, R. Fukuda, J. Hasegawa, M. Ishida, T. Nakajima, Y. Honda, O. Kitao, H. Nakai, T. Vreven, J. A. Montgomery, Jr., J. E. Peralta, F. Ogliaro, M. Bearpark, J. J. Heyd, E. Brothers, K. N. Kudin, V. N. Staroverov, R. Kobayashi, J. Normand, K. Raghavachari, A. Rendell, J. C. Burant, S. S. Iyengar, J. Tomasi, M. Cossi, N. Rega, J. M. Millam, M. Klene, J. E. Knox, J. B. Cross, V. Bakken, C. Adamo, J. Jaramillo, R. Gomperts, R. E. Stratmann, O. Yazyev, A. J. Austin, R. Cammi, C. Pomelli, J. W. Ochterski, R. L. Martin, K. Morokuma, V. G. Zakrzewski, G. A. Voth, P. Salvador, J. J. Dannenberg, S. Dapprich, A. D. Daniels, Ö. Farkas, J. B. Foresman, J. V. Ortiz, J. Cioslowski, and D. J. Fox, Gaussian, Inc., Wallingford CT, 2009.

[2] A. D. Becke, *Phys. Rev. A* **1988**, *38*, 3098-3100. C. Lee, W. Yang, W., R. G. Parr, *Phys. Rev. B* **1988**, *37*, 785-789. A. D. Becke, *J. Chem. Phys.* **1993**, *98*, 5648-5652.

[3] F. Weigend, R. Ahlrichs, *Phys. Chem. Chem. Phys.* **2005**, *7*, 3297-3305.

[4] K. A. Peterson, D. Figgen, E. Goll, H. Stoll, M. Dolg, *J. Chem. Phys.* **2003**, *119*, 11113-11123.

**Tables of the optimized geometries (Cartesian coordinates, in Angstroms).**

**Energies (in Hartrees) in parenthesis.**

**Table S1.** [8,8,8-(H)(PPh<sub>3</sub>)<sub>2</sub>-9-(NC<sub>5</sub>H<sub>5</sub>)-nido-8,7-RhSB<sub>9</sub>H<sub>10</sub>]<sup>+</sup> (**12**) (-3058.85832561)

| Atom | x             | y             | z             |
|------|---------------|---------------|---------------|
| Rh   | -0.206249479  | -0.7102631308 | -0.3663781811 |
| P    | -0.9415245579 | 1.6374707577  | -0.0558738438 |
| P    | 2.1038597242  | -0.5628510389 | 0.2971285887  |
| C    | -2.4416388004 | 1.8745986971  | -1.1222501983 |
| C    | -2.3505361331 | 2.4378530707  | -2.4034694271 |
| C    | -3.6970163344 | 1.4332095238  | -0.6686153653 |
| C    | -3.4849628562 | 2.5515789546  | -3.2114671104 |
| C    | -4.829507719  | 1.5563738656  | -1.4740681402 |
| C    | -4.7260842722 | 2.1119767411  | -2.7517563393 |

|   |               |               |               |
|---|---------------|---------------|---------------|
| C | 0.1645048856  | 3.0166854237  | -0.5874973746 |
| C | 0.1889827263  | 4.2589514051  | 0.0662544902  |
| C | 0.996369068   | 2.8194801831  | -1.7015321536 |
| C | 1.0235607316  | 5.279613642   | -0.3923666297 |
| C | 1.8253293034  | 3.8442643665  | -2.1610294449 |
| C | 1.8411956855  | 5.0770263627  | -1.5062478343 |
| C | 2.774659004   | -2.2186628264 | 0.7692085179  |
| C | 3.9796021866  | -2.6966454152 | 0.2327059533  |
| C | 2.0809960168  | -3.0207907324 | 1.6912416562  |
| C | 4.483751001   | -3.9395029495 | 0.6223353809  |
| C | 2.5963344578  | -4.2524946438 | 2.0917970059  |
| C | 3.799654384   | -4.7167922941 | 1.5558733135  |
| C | 3.3769904132  | 0.1202478704  | -0.8593913765 |
| C | 4.5986645354  | 0.5842442736  | -0.3349012818 |
| C | 3.2015806703  | 0.1208139589  | -2.2503051974 |
| C | 5.6062313636  | 1.0442592925  | -1.1819545102 |
| C | 4.2122607995  | 0.5828052769  | -3.0964728023 |
| C | 5.4153727888  | 1.0478962415  | -2.5655299327 |
| C | -1.5450735656 | 2.1107264059  | 1.6209643965  |
| C | -1.0325838456 | 1.4697086595  | 2.7581752574  |
| C | -2.4902170257 | 3.1402278369  | 1.7911303236  |
| C | -1.451264845  | 1.8480716748  | 4.0356670605  |
| C | -2.9076817805 | 3.5141555065  | 3.0684877337  |
| C | -2.3891761927 | 2.8687494534  | 4.1939038945  |
| C | 2.3579648235  | 0.4807438399  | 1.80955639    |
| C | 2.4490372903  | 1.8764598328  | 1.6714248543  |
| C | 2.4544623196  | -0.0745700729 | 3.0952599617  |
| C | 2.615966968   | 2.6930291739  | 2.7897835157  |
| C | 2.6208136809  | 0.7468748828  | 4.2130109381  |
| C | 2.6973759123  | 2.132184759   | 4.0655720635  |
| H | -0.3053112098 | -0.933884346  | 1.1734094283  |
| H | -1.399614359  | 2.8034299937  | -2.7755369801 |
| H | -3.7964623022 | 1.0207763905  | 0.3313534114  |
| H | -3.3945462973 | 2.9936525053  | -4.1994088096 |
| H | -5.7964997934 | 1.229570931   | -1.1005660098 |
| H | -5.6072446996 | 2.2074648707  | -3.3791666738 |
| H | -0.4314928453 | 4.4325646192  | 0.938016239   |
| H | 1.0092621604  | 1.8599937333  | -2.2071903139 |
| H | 1.0334735355  | 6.2353295011  | 0.124128353   |
| H | 2.4654756841  | 3.6710261197  | -3.0209615839 |
| H | 2.4899902102  | 5.8736847746  | -1.85854758   |
| H | 4.529471515   | -2.1079311447 | -0.4916611641 |
| H | 1.1285171721  | -2.6866819807 | 2.0896347062  |
| H | 5.4146694221  | -4.2962821253 | 0.1914026976  |
| H | 2.0509197922  | -4.8567492484 | 2.8112551933  |
| H | 4.1955698077  | -5.6816134255 | 1.859078268   |
| H | 4.7692488255  | 0.5838495722  | 0.7361974339  |
| H | 2.2830484063  | -0.2452841329 | -2.6885877703 |
| H | 6.5418553146  | 1.3971187316  | -0.7577683042 |
| H | 4.0556683727  | 0.5709191263  | -4.1713193542 |

|   |               |               |               |
|---|---------------|---------------|---------------|
| H | 6.2017087835  | 1.4056471202  | -3.2239880362 |
| H | -0.2988916377 | 0.6794025498  | 2.649252551   |
| H | -2.9081281228 | 3.6468654677  | 0.9268801676  |
| H | -1.0377339957 | 1.3452204545  | 4.9051677199  |
| H | -3.6383357491 | 4.3098455138  | 3.1829586504  |
| H | -2.7155489043 | 3.16176606    | 5.18777859    |
| H | 2.4130737423  | 2.330803577   | 0.6890622957  |
| H | 2.4289815224  | -1.148346134  | 3.2344880901  |
| H | 2.6882755812  | 3.7687145268  | 2.6579981341  |
| H | 2.7071314768  | 0.2964006651  | 5.1979396726  |
| H | 2.8332487464  | 2.7684991404  | 4.9353498192  |
| B | -0.4610960505 | -3.7258310791 | -2.2409700898 |
| B | -2.1624399482 | -2.1567588806 | -0.4496701909 |
| B | 0.5129471259  | -2.3085720414 | -1.9274704588 |
| B | -0.5440866107 | -2.9678849222 | -0.6007262024 |
| B | -1.9632820576 | -1.5421243744 | -3.4651939929 |
| B | -2.9993863556 | -2.289090116  | -2.1206432559 |
| B | -0.3872290946 | -2.5935864706 | -3.5608230087 |
| B | -2.0111034585 | -3.5737579189 | -1.4265911204 |
| B | -1.9549212798 | -3.2904210184 | -3.17232305   |
| S | -0.2500331259 | -0.705880669  | -2.9309571521 |
| N | -3.069051813  | -2.385026628  | 0.8202738952  |
| C | -2.6141025706 | -3.0933910885 | 1.8785313179  |
| C | -4.3339700243 | -1.9039182155 | 0.838572256   |
| C | -3.4090548088 | -3.3337203366 | 2.9897040473  |
| C | -5.1755974052 | -2.104715335  | 1.9222430991  |
| C | -4.7104725793 | -2.8320555997 | 3.0184912559  |
| H | 0.0698245097  | -4.779250789  | -2.3844773491 |
| H | -1.9890617229 | -0.8977716071 | -0.5364901198 |
| H | 1.6932020634  | -2.3584426242 | -2.0011055784 |
| H | -0.0841260711 | -3.6469712438 | 0.259896625   |
| H | -2.4112190847 | -1.0527728106 | -4.4477989658 |
| H | -4.1802976571 | -2.3782148726 | -2.2498409442 |
| H | -2.7042890354 | -1.0731565153 | -2.4283585204 |
| H | 0.1702646718  | -2.7473646204 | -4.5940804615 |
| H | -2.6092303947 | -4.5009329177 | -0.9769939373 |
| H | -2.4184480769 | -4.0575260312 | -3.9513726707 |
| H | -1.6018238063 | -3.4647893197 | 1.790390514   |
| H | -4.646186154  | -1.370165838  | -0.0494792551 |
| H | -3.0078319009 | -3.9135870099 | 3.8133892721  |
| H | -6.1830499377 | -1.7048978231 | 1.8941890121  |
| H | -5.3527965769 | -3.0107628167 | 3.8751713129  |

**Table S2.** [8,8,8-(H)(PMe<sub>3</sub>)(PPh<sub>3</sub>)<sub>2</sub>-9-(NC<sub>5</sub>H<sub>5</sub>)-*nido*-8,7-RhSB<sub>9</sub>H<sub>10</sub>]<sup>+</sup> (**15**) (-2483.68758088)

| Atom | x | y | z |
|------|---|---|---|
|------|---|---|---|

|    |               |               |               |
|----|---------------|---------------|---------------|
| Rh | -0.3325143752 | -0.6862908323 | -0.3566017705 |
| P  | -0.9455414871 | 1.6742757778  | -0.1246695074 |
| P  | 1.9298236158  | -0.5025185418 | 0.2266607687  |
| C  | -2.3712186418 | 2.0368009781  | -1.2508949765 |
| C  | -2.2503105967 | 2.7947160966  | -2.4235286773 |
| C  | -3.6278129998 | 1.4977380649  | -0.9212603303 |
| C  | -3.3573815765 | 2.9961759032  | -3.2533046106 |
| C  | -4.7310952017 | 1.7063796208  | -1.7469540154 |
| C  | -4.5970364986 | 2.4518539339  | -2.9216756802 |
| C  | 0.3377993589  | 2.9201484073  | -0.580611018  |
| C  | 0.660536917   | 4.004832689   | 0.2500077817  |
| C  | 1.0227801964  | 2.773932881   | -1.8011118746 |
| C  | 1.6401095108  | 4.9239686582  | -0.1354746194 |
| C  | 1.9868860383  | 3.704751671   | -2.1905257837 |
| C  | 2.3005719374  | 4.7808234375  | -1.3558654581 |
| C  | -1.5878361902 | 2.2261119947  | 1.5126234075  |
| C  | -1.2717617192 | 1.5246549357  | 2.6845774964  |
| C  | -2.3866634072 | 3.3810586167  | 1.6066107433  |
| C  | -1.7343462958 | 1.9685882916  | 3.9255924545  |
| C  | -2.8479717125 | 3.821967269   | 2.8463614815  |
| C  | -2.5220637907 | 3.1172686421  | 4.008452398   |
| H  | -0.3946500468 | -0.8828745304 | 1.1922099237  |
| H  | -1.3018336476 | 3.2435842755  | -2.6943759166 |
| H  | -3.750202149  | 0.9366283775  | 0.0013804598  |
| H  | -3.2451763728 | 3.5874102147  | -4.1574255061 |
| H  | -5.6983603841 | 1.2943064811  | -1.4725936479 |
| H  | -5.4552302073 | 2.6117353363  | -3.567478031  |
| H  | 0.1498071176  | 4.1399616839  | 1.1969414914  |
| H  | 0.8003778207  | 1.9349526612  | -2.4546136817 |
| H  | 1.8794752163  | 5.7562149811  | 0.520170819   |
| H  | 2.4944943367  | 3.5862614205  | -3.1436679855 |
| H  | 3.0555355437  | 5.5013459929  | -1.6562364476 |
| H  | -0.6713202439 | 0.6232659927  | 2.6241385347  |
| H  | -2.6513384136 | 3.9343629943  | 0.710767265   |
| H  | -1.4800932284 | 1.4152968355  | 4.8253389904  |
| H  | -3.463667563  | 4.7149067129  | 2.9040849791  |
| H  | -2.8833956109 | 3.4620487365  | 4.9730272826  |
| B  | -0.4832468902 | -3.7499727864 | -2.1415575539 |
| B  | -2.2227634644 | -2.1894371176 | -0.3700404864 |
| B  | 0.4439249331  | -2.2935958097 | -1.8908473013 |
| B  | -0.5698947793 | -2.9482306794 | -0.5188938067 |
| B  | -2.068125507  | -1.6506258841 | -3.4037468775 |
| B  | -3.0672554819 | -2.4004962832 | -2.0336436376 |
| B  | -0.4622742977 | -2.6527395187 | -3.4946874856 |
| B  | -2.0267450834 | -3.6269839377 | -1.3094442533 |
| B  | -2.0005255755 | -3.390420117  | -3.0658646098 |
| S  | -0.3700679234 | -0.7424755935 | -2.9151085518 |
| N  | -3.1087240121 | -2.4179734931 | 0.9136274527  |



|   |               |               |               |
|---|---------------|---------------|---------------|
| C | -2.6351744196 | -3.1206966981 | 1.9677570102  |
| C | -4.3771361241 | -1.9464987712 | 0.9467593601  |
| C | -3.4153086988 | -3.3645892695 | 3.0888175184  |
| C | -5.2043549696 | -2.1511792199 | 2.0402543827  |
| C | -4.7202989015 | -2.8735829059 | 3.131942636   |
| H | 0.0816029073  | -4.7886884257 | -2.2616599139 |
| H | -2.1136749169 | -0.9248422148 | -0.5025169324 |
| H | 1.6251336522  | -2.3115919322 | -1.9828892446 |
| H | -0.0651023439 | -3.5786360181 | 0.3597525313  |
| H | -2.542258411  | -1.1999870615 | -4.3924618385 |
| H | -4.2456612108 | -2.5338525042 | -2.1455810288 |
| H | -2.8193677738 | -1.1827958282 | -2.3716754588 |
| H | 0.090483075   | -2.8166563406 | -4.5286060011 |
| H | -2.5863737061 | -4.5642923922 | -0.8326567655 |
| H | -2.4443446421 | -4.1942120836 | -3.8186074338 |
| H | -1.6202343886 | -3.483068395  | 1.8708935115  |
| H | -4.7065315124 | -1.4200308711 | 0.0603228599  |
| H | -2.9993428518 | -3.9395179167 | 3.9086443677  |
| H | -6.2150970381 | -1.7591768869 | 2.0233361778  |
| H | -5.3512408703 | -3.0563182722 | 3.9961737417  |
| C | 2.3004564628  | 0.6823717063  | 1.58858962    |
| H | 2.0272620002  | 1.7007596248  | 1.3024932998  |
| H | 1.7443167999  | 0.4058536157  | 2.4880726814  |
| H | 3.3722665987  | 0.6556057446  | 1.8136676348  |
| C | 2.6042309697  | -2.078091595  | 0.896570358   |
| H | 2.020705965   | -2.3767365457 | 1.7714235195  |
| H | 2.5358536989  | -2.8711023853 | 0.1492952154  |
| H | 3.6510481839  | -1.941013131  | 1.1882826065  |
| C | 3.1421547743  | -0.0097955208 | -1.0701784358 |
| H | 2.9539574623  | 1.0203366716  | -1.3807451314 |
| H | 4.1564834496  | -0.0785548704 | -0.6611767496 |
| H | 3.062878052   | -0.665793418  | -1.9391301362 |

**Table S3.** [8,8,8-(H)(PMePh<sub>2</sub>)<sub>2</sub>-9-(PMePh<sub>2</sub>)-nido-8,7-RhSB<sub>9</sub>H<sub>10</sub>]<sup>+</sup> (**16**) (-3271.67236962)

| Atom | x             | y             | z             |
|------|---------------|---------------|---------------|
| Rh   | 0.3797308498  | -0.1127834223 | -0.2503089834 |
| B    | -0.8070528647 | -2.0872400897 | -2.9499503758 |
| B    | -1.9660581981 | -0.2311263497 | -0.9867117715 |
| B    | 0.6083398149  | -1.5042516343 | -2.1037043369 |
| B    | -0.945608061  | -1.7443538346 | -1.1752880514 |
| B    | -0.6742709681 | 0.7478348384  | -3.6296943625 |
| B    | -2.2602219062 | 0.4288196461  | -2.717472234  |
| B    | 0.1528072641  | -0.9441225206 | -3.8477240973 |
| B    | -2.2395289482 | -1.2945613076 | -2.32612595   |

|   |               |               |               |
|---|---------------|---------------|---------------|
| B | -1.5898753202 | -0.7479213369 | -3.8833893744 |
| S | 1.0282868556  | 0.411147541   | -2.6723612444 |
| P | 0.7985564125  | 1.9976659226  | 0.913809808   |
| P | 2.3079307804  | -1.2140002441 | 0.5886098392  |
| P | -3.4969691987 | -0.0050342025 | 0.2323921442  |
| C | -5.0306177071 | -0.8631347676 | -0.2761432235 |
| C | -5.5801433425 | -1.8989822708 | 0.4932518896  |
| C | -5.6775003698 | -0.4617996663 | -1.4584290472 |
| C | -6.7601300543 | -2.5232531027 | 0.0846622415  |
| C | -6.8559353053 | -1.0885348683 | -1.8579481455 |
| C | -7.3988610536 | -2.1201733495 | -1.0879422828 |
| C | -3.1605853803 | -0.4942748721 | 1.9598122049  |
| C | -3.529736705  | 0.321383576   | 3.0411691242  |
| C | -2.5582147122 | -1.7395773026 | 2.2111572743  |
| C | -3.2944342781 | -0.0993279682 | 4.3522926258  |
| C | -2.3398003789 | -2.1606313701 | 3.523333      |
| C | -2.7026397244 | -1.3400206046 | 4.5948815565  |
| C | -3.9443563331 | 1.775423464   | 0.2566636665  |
| H | -0.1761775031 | -0.6313118819 | 1.1122947955  |
| H | -0.8301415827 | -3.2079306199 | -3.3449698027 |
| H | 1.5801269257  | -2.1774406356 | -2.0550867103 |
| H | -1.0991072206 | -2.7177299259 | -0.5083997328 |
| H | -0.5615482287 | 1.5846827878  | -4.4633135723 |
| H | -3.2410534064 | 1.0241589198  | -3.0382243192 |
| H | 0.8158619624  | -1.1792384503 | -4.8006036424 |
| H | -3.2956176774 | -1.836532798  | -2.2905957645 |
| H | -2.1436090904 | -0.9757657797 | -4.9091978808 |
| H | -5.0994155697 | -2.2183373555 | 1.4112433627  |
| H | -5.2607868676 | 0.325347693   | -2.0783234838 |
| H | -7.1784935873 | -3.3236380399 | 0.6877012978  |
| H | -7.3466782895 | -0.7733051222 | -2.7738622957 |
| H | -8.3168260476 | -2.6076666897 | -1.4028456141 |
| H | -4.0085536641 | 1.2806313778  | 2.8740872656  |
| H | -2.2655439994 | -2.3760102911 | 1.3819353015  |
| H | -3.5851845097 | 0.5387783569  | 5.1816671412  |
| H | -1.8892760744 | -3.1314415526 | 3.7095302082  |
| H | -2.5312574605 | -1.670113116  | 5.6153695702  |
| H | -4.155933635  | 2.0864220382  | -0.7692986583 |
| H | -4.833989957  | 1.9499206481  | 0.8670418524  |
| H | -3.1092051673 | 2.3758363106  | 0.6271110044  |
| H | -1.3393615571 | 1.3208329098  | -2.5910159973 |
| C | -0.182566271  | 3.3962540962  | 0.2040227595  |
| C | -0.0556990658 | 3.6937265064  | -1.163188798  |
| C | -1.0306517401 | 4.1935913751  | 0.989484069   |
| C | -0.7540356417 | 4.7596376046  | -1.7294916876 |
| H | 0.5996835351  | 3.0994377105  | -1.7916479318 |
| C | -1.7348522122 | 5.2576846985  | 0.4181834024  |
| H | -1.1462961555 | 4.0055417699  | 2.0513576639  |

|   |               |               |               |
|---|---------------|---------------|---------------|
| C | -1.5992730308 | 5.5433230803  | -0.9402624429 |
| H | -0.6366231968 | 4.9766863026  | -2.7872043353 |
| H | -2.3824992815 | 5.8671047185  | 1.0422757162  |
| H | -2.1440154905 | 6.3729859851  | -1.3810668408 |
| C | 2.5093714485  | 2.6784084072  | 0.9711397721  |
| C | 3.0471719194  | 3.265629543   | 2.1279293931  |
| C | 3.2775694083  | 2.6645337622  | -0.2045556766 |
| C | 4.3233111532  | 3.8321054456  | 2.1035025833  |
| H | 2.4796752674  | 3.2972437166  | 3.0520812648  |
| C | 4.5449085933  | 3.2450535354  | -0.2291509642 |
| H | 2.8923822086  | 2.1910169092  | -1.102459524  |
| C | 5.0707406913  | 3.8293101503  | 0.9250544556  |
| H | 4.7268647505  | 4.2831434455  | 3.0055771761  |
| H | 5.1246689853  | 3.2290007101  | -1.1470850878 |
| H | 6.0595913094  | 4.278306664   | 0.9069471669  |
| C | 2.2201564436  | -3.0518722157 | 0.5476024553  |
| C | 3.2481171006  | -3.8364214053 | 0.0062563137  |
| C | 1.1135877428  | -3.682780009  | 1.138241474   |
| C | 3.1664403032  | -5.2299345554 | 0.054957038   |
| H | 4.1128297191  | -3.369461898  | -0.4518383098 |
| C | 1.0415096635  | -5.0734131795 | 1.1923960999  |
| H | 0.3015414067  | -3.0863488152 | 1.5426385878  |
| C | 2.0667006093  | -5.8503921557 | 0.6470637302  |
| H | 3.9664526493  | -5.827701767  | -0.3720010001 |
| H | 0.1804529188  | -5.5520920478 | 1.650239546   |
| H | 2.0056553245  | -6.9342023151 | 0.6821292639  |
| C | 3.954763788   | -0.778582655  | -0.1125190888 |
| C | 5.0223728853  | -0.421995756  | 0.7286761239  |
| C | 4.1815463867  | -0.8288643203 | -1.4998457718 |
| C | 6.2783636763  | -0.1242486139 | 0.1976220319  |
| H | 4.8925775581  | -0.3704692282 | 1.8029068449  |
| C | 5.4385836172  | -0.532361591  | -2.0264455355 |
| H | 3.3856607769  | -1.1141510897 | -2.1759162566 |
| C | 6.4910213662  | -0.1778012902 | -1.1798023544 |
| H | 7.0899250874  | 0.1468819264  | 0.866640043   |
| H | 5.5931971371  | -0.5840132381 | -3.10029242   |
| H | 7.4702303348  | 0.0500807112  | -1.5909834278 |
| C | 0.2488609519  | 1.9329042661  | 2.6748095666  |
| H | -0.7931011297 | 1.6044742952  | 2.7067886525  |
| H | 0.8463774154  | 1.195841266   | 3.2139976236  |
| H | 0.3381193489  | 2.8969891769  | 3.1820069117  |
| C | 2.5063705349  | -0.9224935709 | 2.4043116458  |
| H | 2.7498790068  | 0.1224809696  | 2.6106767286  |
| H | 1.5654875553  | -1.1789848239 | 2.8962099631  |
| H | 3.295020428   | -1.5642347605 | 2.806330913   |
| H | -1.1838639912 | 0.7142044566  | -0.6322606162 |

**Table S4.** [1,3- $\mu$ -(H)-1,1-(PMe<sub>3</sub>)(PPh<sub>3</sub>)<sub>2</sub>-3-(NC<sub>5</sub>H<sub>5</sub>)-isonido-8,7-RhSB<sub>9</sub>H<sub>8</sub>]<sup>+</sup> (20) (-2482.48787842)

| Atom | x           | y           | z           |
|------|-------------|-------------|-------------|
| H    | 1.19070600  | 0.37188800  | -1.04009600 |
| C    | -1.04496000 | 1.53514300  | 2.75436300  |
| H    | -0.20083200 | 2.07555800  | 2.33982300  |
| Rh   | 0.68243600  | -0.83237800 | -0.18321700 |
| P    | 0.16470500  | -1.68219100 | -2.37886100 |
| P    | -1.35216300 | 0.51936000  | 0.15720600  |
| N    | 3.36205700  | 1.09578300  | -0.02543200 |
| S    | -0.06389900 | -2.79831700 | 1.09784000  |
| B    | 3.02806100  | -2.87600100 | 1.35774700  |
| H    | 3.92521400  | -3.65642400 | 1.40158000  |
| B    | 1.55574000  | -3.31948000 | 2.17219300  |
| H    | 1.35138000  | -4.32886500 | 2.75561200  |
| B    | 1.68376600  | -3.16318100 | 0.29078600  |
| H    | 1.61724100  | -4.07265900 | -0.47071500 |
| B    | 2.87589100  | -1.79597200 | -0.07067900 |
| H    | 3.56336900  | -2.00453400 | -1.02457500 |
| B    | 3.42198100  | -1.16896900 | 1.53408900  |
| H    | 4.52343000  | -0.81460800 | 1.82356100  |
| B    | 2.35900800  | -1.88068300 | 2.74666600  |
| H    | 2.75202100  | -1.84703200 | 3.86964000  |
| B    | 2.57622400  | -0.16113900 | 0.43850300  |
| B    | 1.84470700  | -0.33176100 | 1.97417400  |
| H    | 1.72521300  | 0.63814400  | 2.65921500  |
| B    | 0.66159700  | -1.69629500 | 2.49383600  |
| H    | -0.11767000 | -1.47627800 | 3.35779200  |
| C    | 2.86637300  | 2.33672400  | 0.19607800  |
| H    | 1.88740000  | 2.37506900  | 0.65429000  |
| C    | 3.57664100  | 3.47477600  | -0.14846500 |
| H    | 3.14493200  | 4.44943900  | 0.04928600  |
| C    | 4.83603800  | 3.34011100  | -0.73748200 |
| H    | 5.41330700  | 4.21743200  | -1.01214100 |
| C    | 5.34129800  | 2.05963200  | -0.96282500 |
| H    | 6.31538200  | 1.90558700  | -1.41339700 |
| C    | 4.58442600  | 0.95757700  | -0.59286400 |
| H    | 4.92650500  | -0.05963700 | -0.73081400 |
| C    | -1.23284900 | 2.27309700  | -0.42082100 |
| C    | -0.39542600 | 2.63240800  | -1.48751300 |
| H    | 0.23809300  | 1.88408600  | -1.95136400 |
| C    | -0.36404400 | 3.94508100  | -1.96337800 |
| H    | 0.28826800  | 4.20147300  | -2.79368200 |
| C    | -1.17012400 | 4.92187200  | -1.37686900 |
| H    | -1.14624400 | 5.94349400  | -1.74498900 |
| C    | -2.00999800 | 4.57804200  | -0.31530100 |
| H    | -2.64220500 | 5.33079100  | 0.14660700  |
| C    | -2.04457000 | 3.26601900  | 0.15858100  |

|   |             |             |             |
|---|-------------|-------------|-------------|
| H | -2.70479200 | 3.01688000  | 0.98235900  |
| C | 1.68367900  | -2.09587600 | -3.33517200 |
| H | 2.24191900  | -2.88593900 | -2.82924600 |
| H | 2.32899500  | -1.21673400 | -3.41500200 |
| H | 1.40834700  | -2.43307700 | -4.34063300 |
| C | -0.72263000 | -0.56547100 | -3.54880600 |
| H | -0.86706400 | -1.07661000 | -4.50685600 |
| H | -0.13311800 | 0.33949700  | -3.72120700 |
| H | -1.69770300 | -0.27871500 | -3.14903200 |
| C | -0.81168600 | -3.24225500 | -2.48250000 |
| H | -0.84357500 | -3.58783700 | -3.52169200 |
| H | -1.83262900 | -3.06779100 | -2.13632900 |
| H | -0.35168400 | -4.01776000 | -1.86495500 |
| C | -2.88927800 | -0.11103400 | -0.65667300 |
| C | -3.71678900 | 0.71353100  | -1.43560800 |
| H | -3.46490400 | 1.75723600  | -1.58631800 |
| C | -4.87716400 | 0.20111400  | -2.02215800 |
| H | -5.50414400 | 0.85303300  | -2.62361700 |
| C | -5.23475700 | -1.13370500 | -1.83123900 |
| H | -6.14091800 | -1.52667300 | -2.28268600 |
| C | -4.42175800 | -1.96236300 | -1.05379700 |
| H | -4.69522300 | -3.00133600 | -0.89260000 |
| C | -3.25299700 | -1.45863000 | -0.48086300 |
| H | -2.63092200 | -2.11890200 | 0.11626200  |
| C | -1.82748800 | 0.70640500  | 1.93108700  |
| C | -2.92198900 | 0.03322900  | 2.49374300  |
| H | -3.56009000 | -0.59404400 | 1.88224300  |
| C | -3.21761300 | 0.17806700  | 3.85131500  |
| H | -4.06995200 | -0.34845900 | 4.27072800  |
| C | -2.43223300 | 0.99840400  | 4.66049400  |
| H | -2.66543000 | 1.10971300  | 5.71529800  |
| C | -1.34739500 | 1.68238000  | 4.10606600  |
| H | -0.73352200 | 2.32836000  | 4.72690700  |

**Table S5.** [9,10- $\mu$ -(H)-8,8-(PMe<sub>3</sub>)(PPh<sub>3</sub>)<sub>2</sub>-9-(NC<sub>5</sub>H<sub>5</sub>)-*nido*-8,7-RhSB<sub>9</sub>H<sub>8</sub>]<sup>+</sup> (20) (-2482.49162720)

| Atom | x             | y             | z             |
|------|---------------|---------------|---------------|
| H    | 2.4515542812  | -0.3048664071 | 0.8827784222  |
| C    | -0.2165188603 | 1.0257018939  | 3.3144517378  |
| H    | 0.6276862161  | 1.410734416   | 2.7476288696  |
| Rh   | 0.3436972702  | -0.9702676096 | -0.2409317707 |
| P    | -0.3379942218 | -0.7090036064 | -2.4808903036 |
| P    | -1.355942895  | 0.5468434491  | 0.8012454079  |
| N    | 3.0655742532  | 0.4693195558  | -1.2549324709 |
| S    | 0.6726538972  | -2.0508725894 | 1.9641475142  |
| B    | 2.632439934   | -3.5717754086 | 0.0797862062  |

|   |               |               |               |
|---|---------------|---------------|---------------|
| H | 2.9367133869  | -4.6359485532 | -0.3528332481 |
| B | 2.0267115033  | -3.5006859339 | 1.7341662831  |
| H | 1.8194921628  | -4.4360829032 | 2.4302678839  |
| B | 0.9491950642  | -3.1319053185 | 0.2500137691  |
| H | 0.0087052392  | -3.8239415323 | 0.0220825038  |
| B | 1.9822103767  | -2.3283598289 | -1.0084367401 |
| H | 1.9197785948  | -2.6224619115 | -2.1620391778 |
| B | 3.5962241364  | -2.1214228654 | -0.2896799207 |
| H | 4.5829752102  | -2.1888915979 | -0.9543225664 |
| B | 3.5739562758  | -2.7379910455 | 1.3783385141  |
| H | 4.5945439769  | -3.1309505549 | 1.8446475259  |
| B | 2.5154505483  | -0.7359683879 | -0.4283912961 |
| B | 3.5137622525  | -0.9951433617 | 1.0976805175  |
| H | 4.4038700766  | -0.2454032139 | 1.347173871   |
| B | 2.5330134798  | -1.8675809162 | 2.4377459511  |
| H | 2.7092200854  | -1.6691029475 | 3.593106396   |
| C | 2.8658469348  | 1.7393798615  | -0.825246071  |
| H | 2.2467587286  | 1.8515613699  | 0.0555041954  |
| C | 3.4247781637  | 2.8259652223  | -1.4770417433 |
| H | 3.2462825648  | 3.8235113286  | -1.0915380567 |
| C | 4.2161155639  | 2.6089816986  | -2.6078379847 |
| H | 4.672034053   | 3.4435768956  | -3.1311779039 |
| C | 4.4175073711  | 1.3003506295  | -3.046645046  |
| H | 5.0300528194  | 1.0813003453  | -3.914092803  |
| C | 3.8354240963  | 0.2520127899  | -2.3487411652 |
| H | 3.9818673927  | -0.7835282377 | -2.6240676271 |
| C | -1.2962492645 | 2.3547858563  | 0.4370123797  |
| C | -0.5112030675 | 2.8438478202  | -0.6166358516 |
| H | 0.064110786   | 2.1470227594  | -1.2178596075 |
| C | -0.4570551495 | 4.2122066026  | -0.892535146  |
| H | 0.1509026392  | 4.5759195227  | -1.7168050326 |
| C | -1.1842627212 | 5.1108789943  | -0.1106912802 |
| H | -1.1433994695 | 6.175408174   | -0.3221163732 |
| C | -1.9590590765 | 4.6373964499  | 0.9513854302  |
| H | -2.5188334911 | 5.3329210226  | 1.5698295857  |
| C | -2.0115474587 | 3.2712163417  | 1.2285660854  |
| H | -2.6015846655 | 2.9185727877  | 2.0690142283  |
| C | 0.8600828363  | -0.4214558375 | -3.8576324213 |
| H | 1.6599952341  | -1.1629594414 | -3.8275359624 |
| H | 1.2928654639  | 0.5810679306  | -3.7875712933 |
| H | 0.3365529733  | -0.5055413434 | -4.8159429622 |
| C | -1.683233844  | 0.4668743068  | -2.9589607758 |
| H | -1.9994876244 | 0.2509909487  | -3.9854636325 |
| H | -1.3408942485 | 1.5029248376  | -2.9077499909 |
| H | -2.5427963637 | 0.3538241294  | -2.2950094939 |
| C | -1.1032523291 | -2.3311902063 | -2.9196603796 |
| H | -1.4619497544 | -2.3083220269 | -3.9549104914 |
| H | -1.9508865303 | -2.5237525424 | -2.2556209737 |

|   |               |               |               |
|---|---------------|---------------|---------------|
| H | -0.3743345149 | -3.1358757652 | -2.8031183222 |
| C | -3.0442051195 | -0.0341042488 | 0.3432115399  |
| C | -4.1012840842 | 0.825739932   | 0.0101225691  |
| H | -3.9551130386 | 1.9009473155  | 0.0131516485  |
| C | -5.3511709799 | 0.3038930192  | -0.334368697  |
| H | -6.161059292  | 0.9801519687  | -0.5925636366 |
| C | -5.5614222452 | -1.0760295415 | -0.3431152199 |
| H | -6.5353340319 | -1.4768625075 | -0.6081887525 |
| C | -4.5152796552 | -1.9406411866 | -0.0098574934 |
| H | -4.6729978652 | -3.015385927  | -0.0095656946 |
| C | -3.262500065  | -1.4243668444 | 0.3232391466  |
| H | -2.4548118599 | -2.1063130511 | 0.5812451323  |
| C | -1.3529332351 | 0.5357133545  | 2.647276147   |
| C | -2.4267554585 | 0.0444189724  | 3.4018601703  |
| H | -3.314506007  | -0.3371427891 | 2.9093197944  |
| C | -2.3635608812 | 0.0448125712  | 4.7984684746  |
| H | -3.2026126768 | -0.3391037609 | 5.3714753418  |
| C | -1.2337554159 | 0.5344815716  | 5.4523008891  |
| H | -1.1870261106 | 0.5314978969  | 6.5372650448  |
| C | -0.1589991249 | 1.0278165723  | 4.7064279391  |
| H | 0.7248578543  | 1.4097936368  | 5.2089272636  |
